# Supplementary material for: Integrating Microbial Fuel Cell and Hydroponic Technologies Using a Ceramic Membrane Separator to Develop an Energy–Water–Food Supply System
Source: MDPI journal article supplement (doi:10.3390/membranes13090803), 2023-09-19
Supplement: s1 [file s1]

## Supplemental Information

Table S1. Summary of different integrated systems for wastewater treatment, nutrient removal, and resource recovery (modified from [18])

| Type of System / Characteristics                                                                        | Type of wastewater / Electrodes                                                                                                                | Plant type / External resistance        | Average Voltage<br>mV                                                 | Max power density<br>mW/m <sup>2</sup>                                                                       | Current density<br>mA/m <sup>2</sup>                                                                      | CE<br>% | COD Removal<br>%                                                                | Nitrate Removal<br>% | Phosphate Removal<br>%                                                 | Plant biomass grow                       | Phosphate Recovery<br>% | Reference |
|---------------------------------------------------------------------------------------------------------|------------------------------------------------------------------------------------------------------------------------------------------------|-----------------------------------------|-----------------------------------------------------------------------|--------------------------------------------------------------------------------------------------------------|-----------------------------------------------------------------------------------------------------------|---------|---------------------------------------------------------------------------------|----------------------|------------------------------------------------------------------------|------------------------------------------|-------------------------|-----------|
| Two Upflow hydroponic CW-MFC (With ceramic separator, Without ceramic separator)<br><br>Continuous mode | Synthetic wastewater<br><br>Anode & cathode: carbon felts                                                                                      | <i>Canna indica</i><br><br>1000 Ω       | With ceramic separator: ~900 mV<br>Without ceramic separator: ~800 mV | With ceramic separator: 258.78 mW.m <sup>-3</sup><br><br>Without ceramic separator: 91.02 mW.m <sup>-3</sup> | With ceramic separator: ~560 mA.m <sup>-3</sup><br><br>Without ceramic separator: ~190 mA.m <sup>-3</sup> | NA      | With ceramic separator: 86.2±8.1 %<br><br>Without ceramic separator: 91.5±4.9 % | NA                   | NA                                                                     | NA                                       | NA                      | [28]      |
| Integrated drip hydroponics-MFC<br><br>Batch recirculation mode.                                        | Domestic sewage collected from the sedimentation tank of the primary treatment unit<br><br>Anode& cathode: non-catalyzed disc-shaped graphite. | <i>Cymbopogon citratus</i><br><br>20 kΩ | In series: 1490±91 mV<br><br>In parallel: 1580±5 mV                   | 31.9 mW.m <sup>-2</sup> in series and parallel                                                               | In series: ~36 mA.m <sup>-2</sup><br><br>In parallel: ~458 mA.m <sup>-2</sup>                             | NA      | 72±2.4% at<br><br>HRT = 3 hours<br><br>85.7±0.6 % at HRT = 12 hours             | NA                   | 83.2±1.1 % at<br><br>HRT = 3 hours<br><br>85.8±0.6 % at HRT = 12 hours | Per plant: 45±15 cm<br><br>0.216±0.039 g | NA                      | [30]      |

Table S1. (continued)

[illegible]

Table S1. (continued)

| Type of System<br>/<br>Characteristics                                         | Type of<br>wastewater /<br>Electrodes                              | Plant type /<br>External<br>resistance                                                                      | Average<br>Voltage<br><br>mV | Max<br>power<br>density<br><br>mW/m <sup>2</sup>                                 | Current<br>density<br><br>mA/m <sup>2</sup> | CE<br><br>% | COD<br>Removal<br><br>% | Nitrate<br>Removal<br><br>%                   | Phosphate<br>Removal<br><br>% | Plant<br>biomass<br>grow | Phosphate<br>Recovery<br><br>% | Reference |
|--------------------------------------------------------------------------------|--------------------------------------------------------------------|-------------------------------------------------------------------------------------------------------------|------------------------------|----------------------------------------------------------------------------------|---------------------------------------------|-------------|-------------------------|-----------------------------------------------|-------------------------------|--------------------------|--------------------------------|-----------|
| Ecological<br>floating bed-<br>MFC                                             | Synthetic<br>eutrophication<br>influent                            | <i>Cyperus<br/>alternifolius<br/>Linn.subsp.<br/>flabelliformis<br/>(Rottb.)<br/>Kukenth<br/>(EFB-MFC1)</i> | Control:<br>99mV             |                                                                                  |                                             |             | Control:<br>73.88%      | TN:                                           |                               |                          |                                |           |
| After 30 days<br>start-up period,<br>operated<br>continuously for<br>116 days. | Anode &<br>Cathode:<br>stainless-steel<br>mesh and<br>carbon felt. | <i>Ceratophyllum<br/>demersum<br/>Linn (EFB-<br/>MFC2)</i>                                                  | EFB-MFC1:<br>125 mV          | The<br>maximum<br>power<br>density<br>was EFB-<br>MFC4:<br>6.03mWm <sup>-2</sup> | NA                                          | NA          | EFB-<br>MFC1:<br>73%    | Control:<br>38.74%<br>EFB-<br>MFC1:<br>34.76% |                               |                          |                                |           |
|                                                                                |                                                                    | <i>Eichhornia<br/>crassipes<br/>(Mart.) Solms<br/>Pontereia<br/>crassipes Mart<br/>(EFB-MFC3)</i>           | EFB-MFC2:<br>144 mV          |                                                                                  |                                             |             | EFB-<br>MFC2:<br>76.37% | EFB-<br>MFC2:<br>41.65%                       | NA                            | NA                       | NA                             | [27]      |
|                                                                                |                                                                    | <i>Ipomoea<br/>aquatic Forsk<br/>(EFB-MFC4)</i>                                                             | EFB-MFC3:<br>157 mV          |                                                                                  |                                             |             | EFB-<br>MFC3:<br>78.23% | EFB-<br>MFC3:<br>51.21%                       |                               |                          |                                |           |
|                                                                                |                                                                    | 500 Ω                                                                                                       | EFB-MFC4:<br>161 mV          |                                                                                  |                                             |             | EFB-<br>MFC4:<br>82.49% | EFB-<br>MFC4:<br>55.6%                        |                               |                          |                                |           |

Table S1. (continued)

[illegible]

(a) MFC-Hyp 1 (with plant)

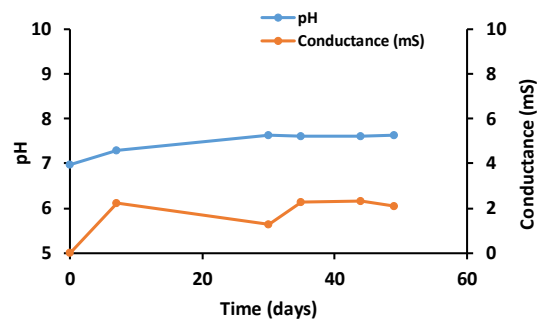

(b) MFC-Hyp 2 (with plant)

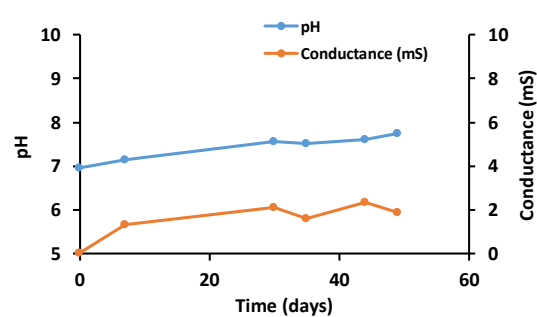

(c) MFC-Hyp 3 (with plant)

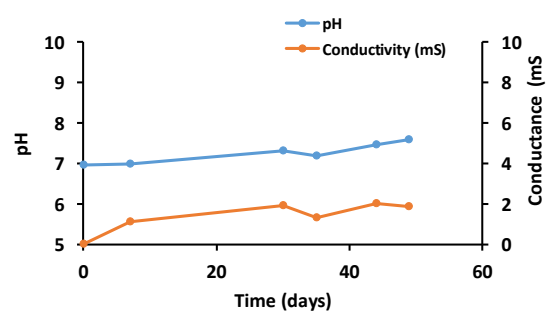

**Figure S1:** pH and conductance of water in the hydroponics in the presence of *A. tuberosum*: (a) MFC-Hyp 1; (b) MFC-Hyp 2; (3) MFC-Hyp 3

(a) MFC-Hyp 1 (without plant)

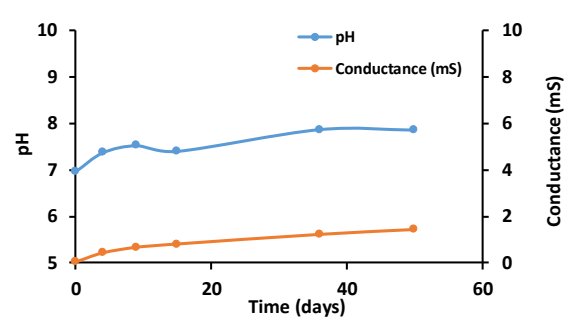

(b) MFC-Hyp 2 (without plant)

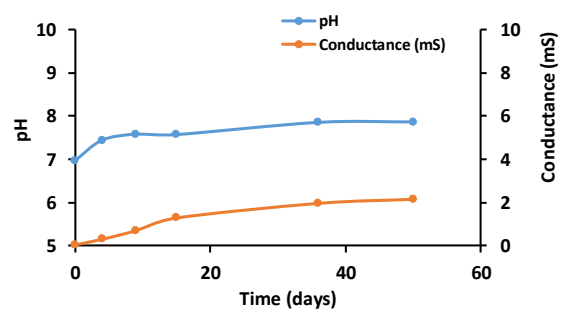

(c) MFC-Hyp 3 (without plant)

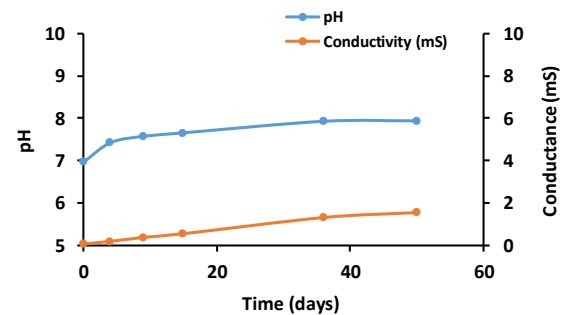

**Figure S2:** pH and conductance of water in the hydroponics in the absence of *A. tuberosum*: (a) MFC-Hyp 1; (b) MFC-Hyp 2; (c) MFC-Hyp 3

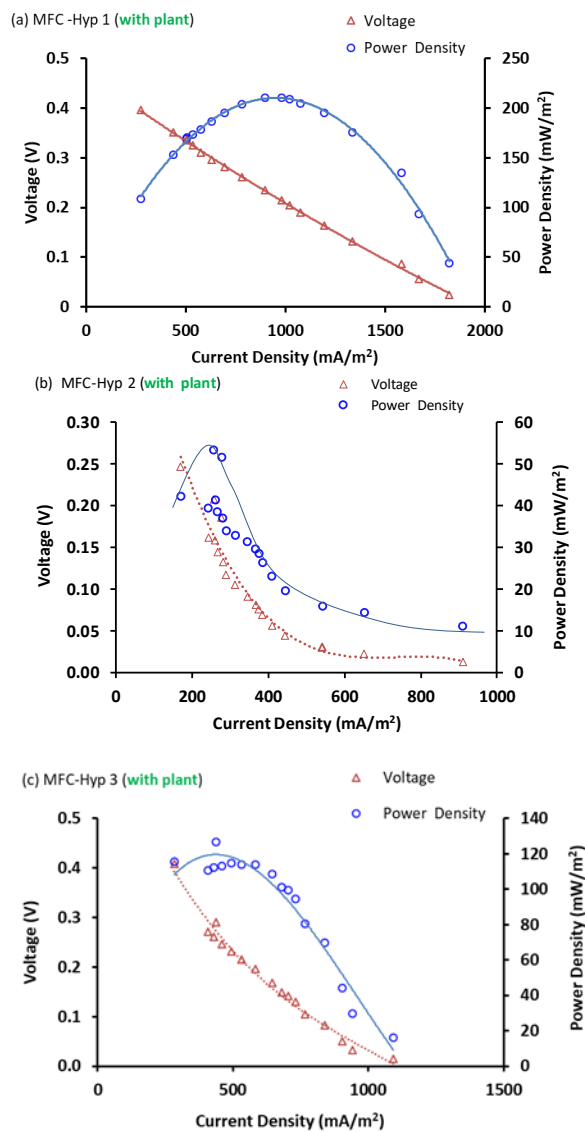

Figure S3. Polarization and power density curves for MFC-Hyp 1, 2, and 3 in the presence of *A. tuberosum*.

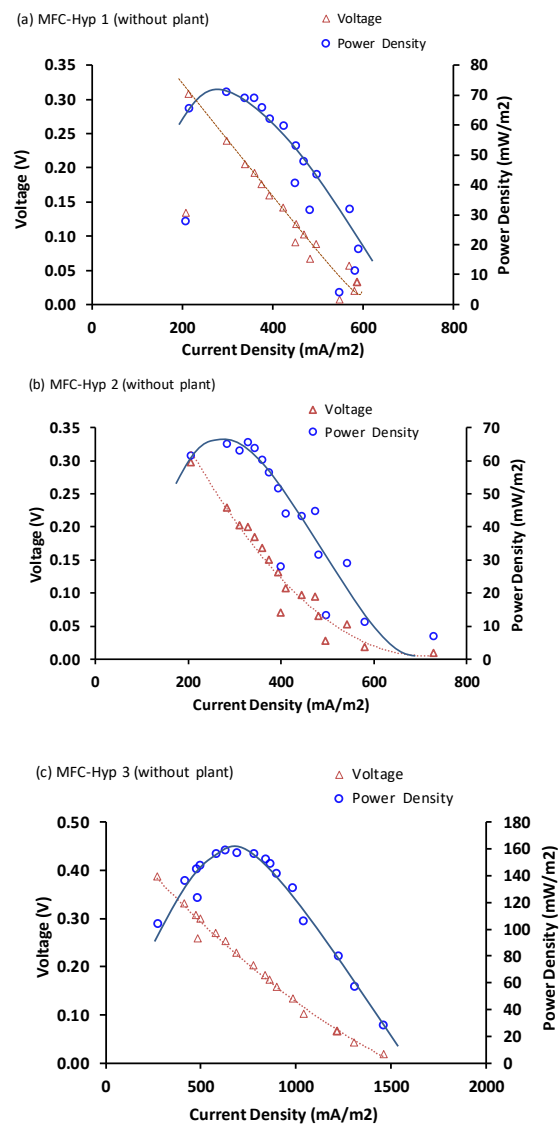

Figure S4. Polarization and power density curves for MFC-Hyp 1, 2, and 3 in the absence of *A. tuberosum*.
